# Supplementary material
Source: publisher figshare collection journal article supplement (https://acs.figshare.com/ndownloader/files/4403806)
Supplement: Supplementary file 1 [file 4403806]

## Supporting Information

### Analysis of the Bromate-Sulfite-Ferrocyanide pH Oscillator Using the Particle Filter -Toward the Automated Modeling of Complex Chemical Systems-

Naoya Sato, Hiroshi H. Hasegawa, Rika Kimura, Yoshihito Mori, and  
Noriaki Okazaki

**Table S1. Optimized rate constants in the extended RKH model.<sup>a</sup>**

| Fitting method                    | $k_3 / \text{M}^{-1}\text{s}^{-1}$ | $k_4 / \text{M}^{-1}\text{s}^{-1}$ | $k_5 / \text{Ms}^{-1}$ | $k'_5 / \text{M}$    |
|-----------------------------------|------------------------------------|------------------------------------|------------------------|----------------------|
| Single-curve fitting <sup>b</sup> | $9.8 \times 10^{-2}$               | 22                                 | $2.9 \times 10^{-5}$   | $8.0 \times 10^{-4}$ |
| Two-curve fitting <sup>c</sup>    | $1.0 \times 10^{-1}$               | 20                                 | $2.7 \times 10^{-5}$   | $7.3 \times 10^{-4}$ |

<sup>a</sup> Fixed parameters:  $[\text{BrO}_3^-]_0 = 75 \text{ mM}$ ,  $[\text{Fe}(\text{CN})_6^{4-}]_0 = 15 \text{ mM}$ ,  $[\text{H}^+]_0 = 15 \text{ mM}$  and temperature =  $40.0^\circ\text{C}$ .

<sup>b</sup> Control parameters of the reference data:  $[\text{SO}_3^{2-}]_0 = 90 \text{ mM}$  and  $k_0 = 0.05 \text{ min}^{-1}$ .

<sup>c</sup> Control parameters of the reference data:  $[\text{SO}_3^{2-}]_0 = 90 \text{ mM}$  and  $k_0 = 0.05 \text{ min}^{-1}$ , and  $[\text{SO}_3^{2-}]_0 = 80 \text{ mM}$  and  $k_0 = 0.1 \text{ min}^{-1}$ , respectively.

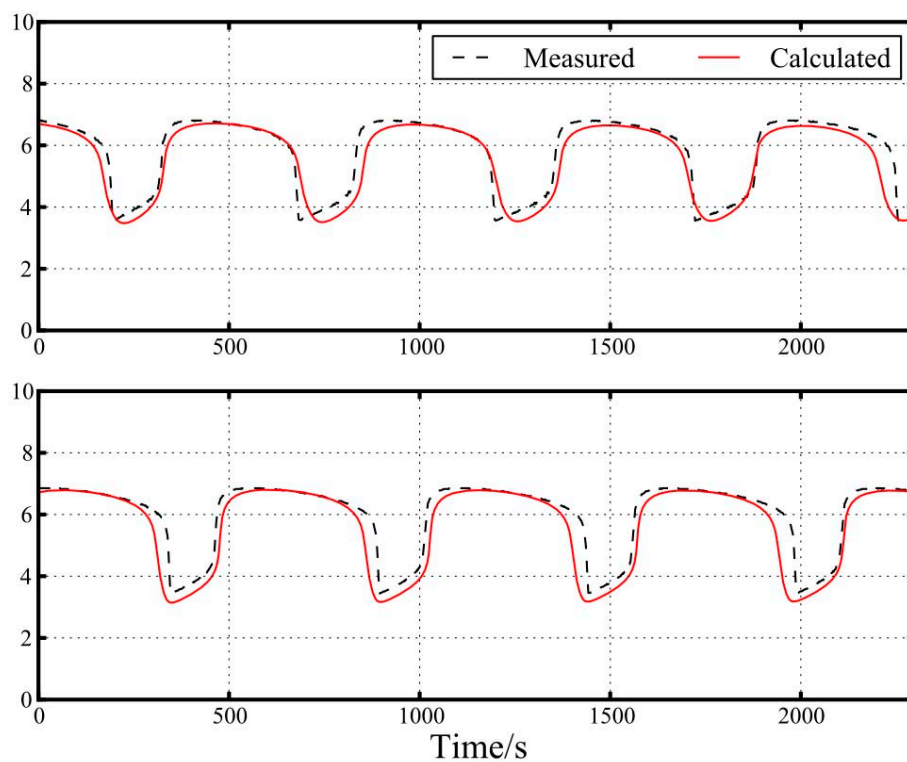

**Figure S1.** Best-fit oscillatory pH curves in the extended RKH model (red solid lines) obtained by the simultaneous curve fitting of the two experimental data (black dashed lines). See Table S1 for the optimized rate constants. Fixed parameters:  $[\text{BrO}_3^-]_0 = 75$  mM,  $[\text{Fe}(\text{CN})_6^{4-}]_0 = 15$  mM,  $[\text{H}^+]_0 = 15$  mM and temperature =  $40.0^\circ\text{C}$ . Control parameters: (a)  $[\text{SO}_3^{2-}]_0 = 90$  mM and  $k_0 = 0.05 \text{ min}^{-1}$ , (b)  $[\text{SO}_3^{2-}]_0 = 80$  mM and  $k_0 = 0.1 \text{ min}^{-1}$ .

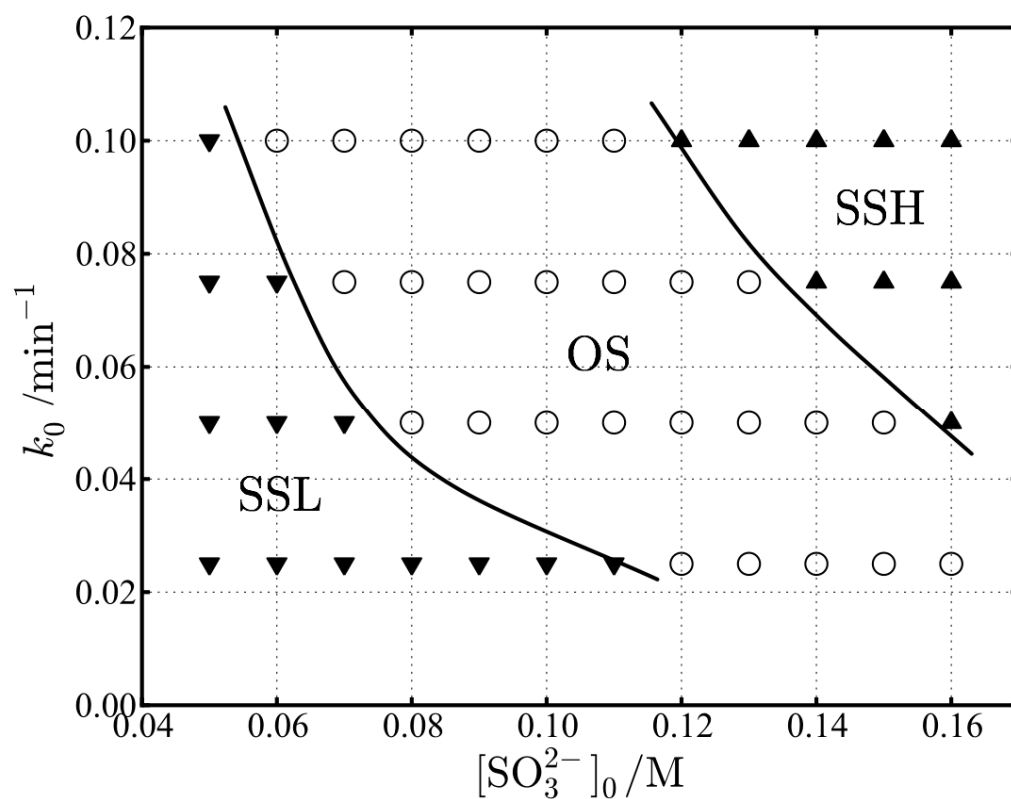

**Figure S2.** State diagram in the extended RKH model calculated with the rate constants obtained by the two-curve fitting method (Table S1). Fixed parameters:  $[\text{BrO}_3^-]_0 = 75$  mM,  $[\text{Fe}(\text{CN})_6^{4-}]_0 = 15$  mM,  $[\text{H}^+]_0 = 15$  mM and temperature =  $40.0^\circ\text{C}$ . Steady state with high/low pH (SSH/SSL) and oscillatory state (OS) are indicated by closed triangle up/down and open circle, respectively.
